# Supplementary material for: The Computed Sinusoid
Source: MDPI journal article supplement (doi:10.3390/livers3040043), 2023-11-11
Supplement: s1 [file s1]

Archive with 1 entries (1 files):
- livers-2540950-supplementary.pdf
