# Supplementary material for: The Computed Sinusoid
Source: MDPI journal article supplement (doi:10.3390/livers3040043), 2023-11-11
Supplement: s1 [file s1 › livers-2540950-supplementary.pdf]

---

**Supplementary Figures**

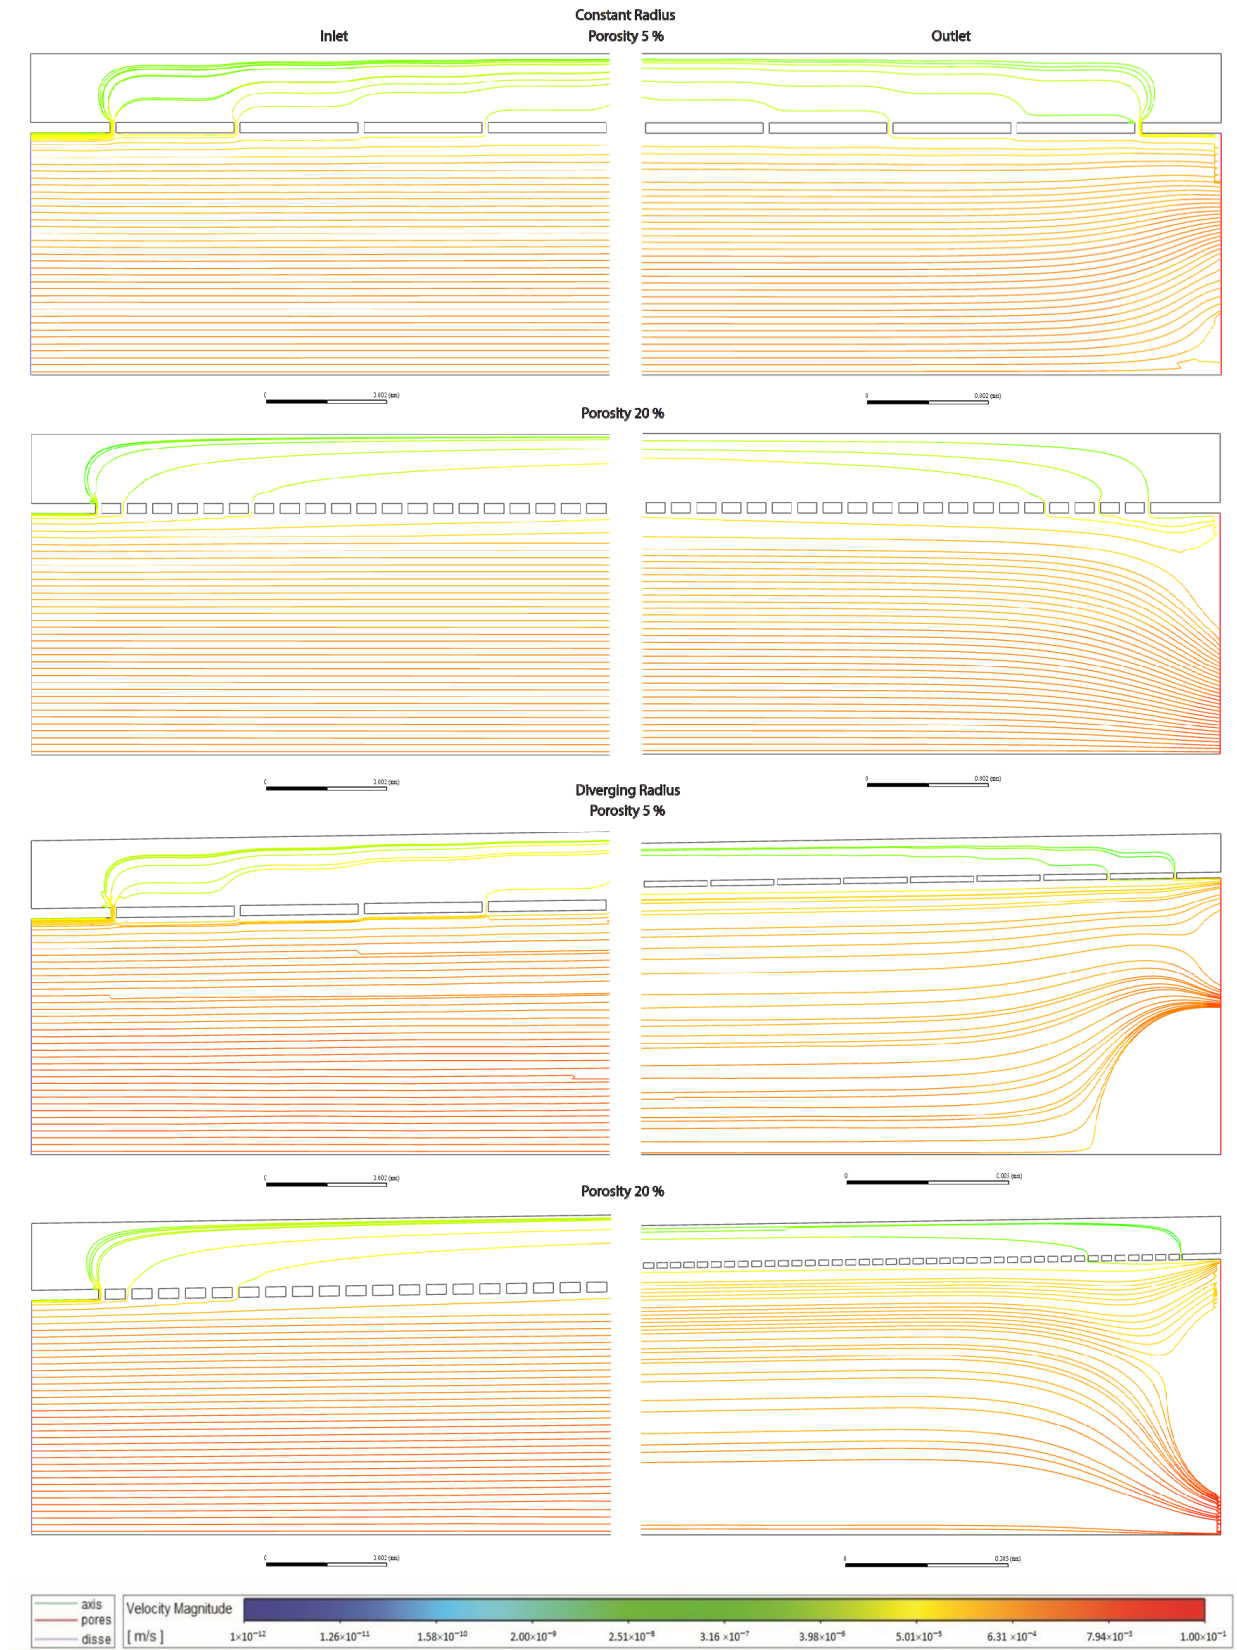

**Figure S1.** Streamlines at Inlet (left hand side) and Outlet (right hand side) for sinusoids modelled without lymphatic drainage. Models are with constant radius (cylinder) or with diverging radius (conical) and low (5%) porosity or high (20%) porosity.

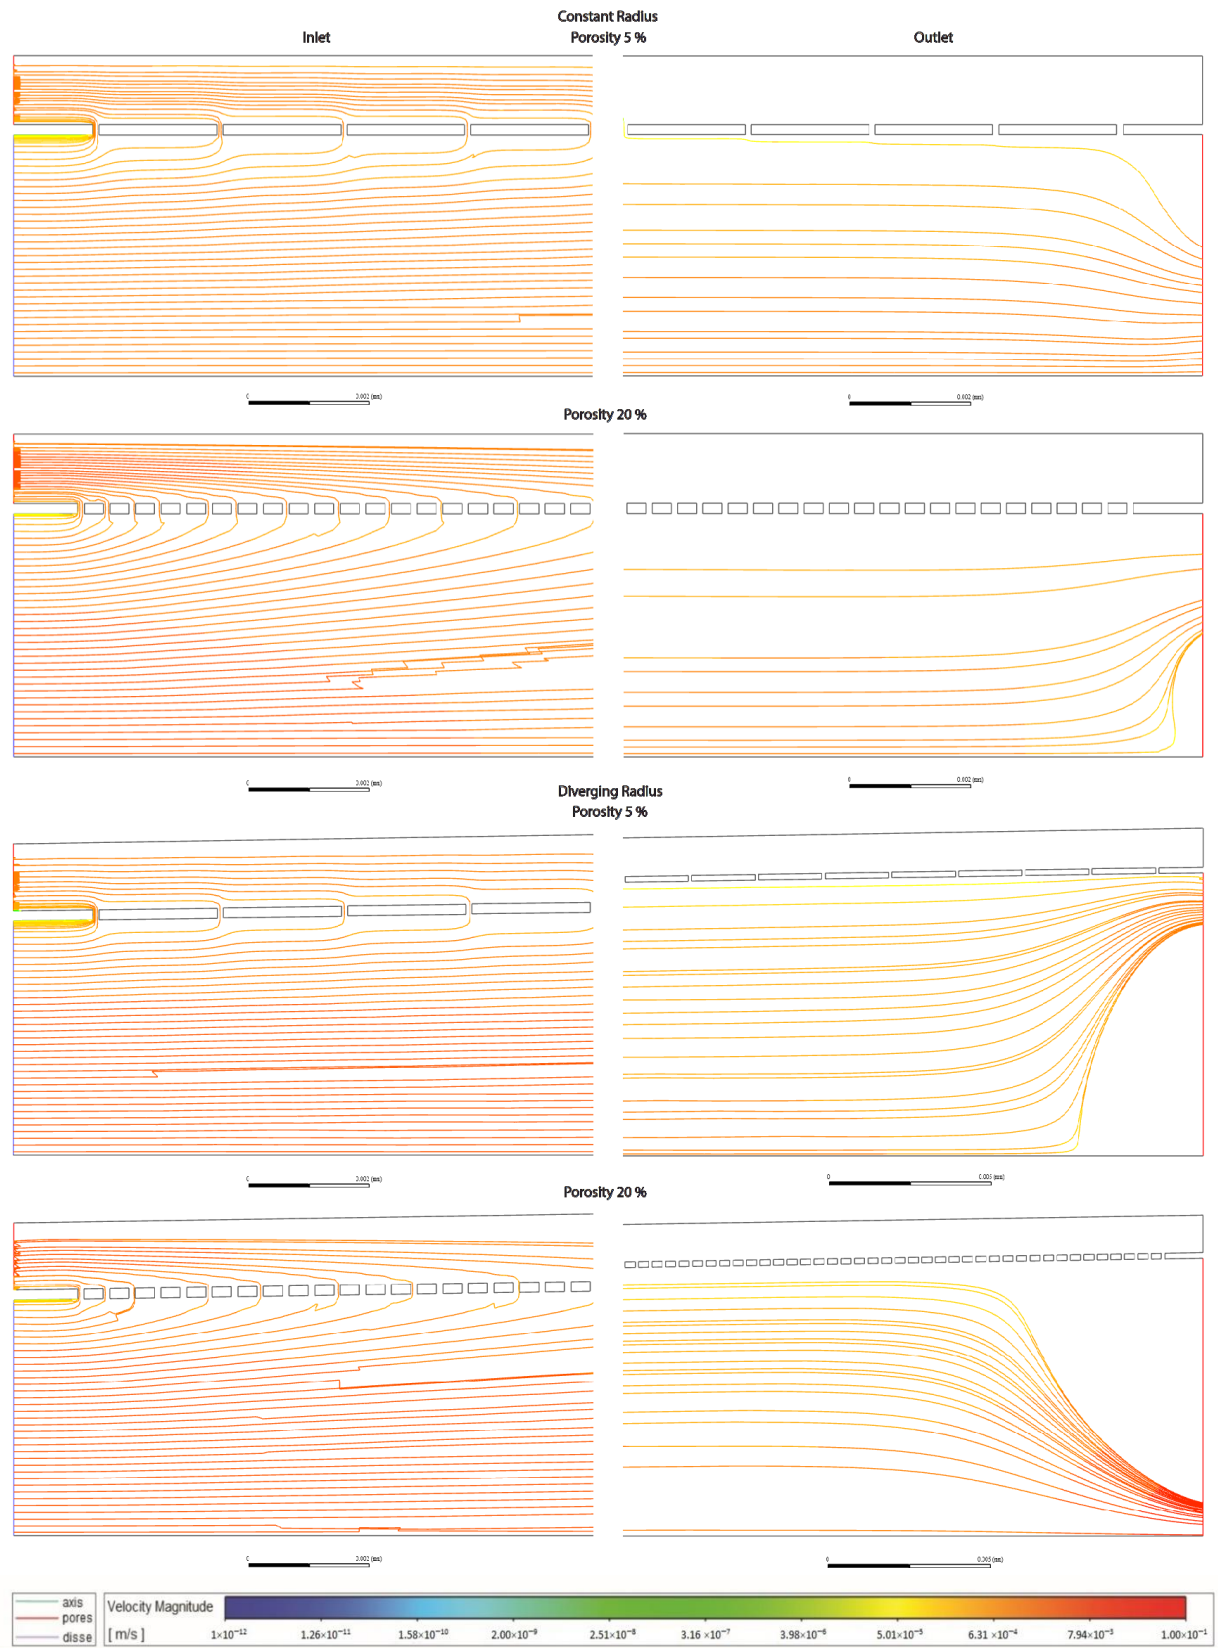

**Figure S2. Streamlines at Inlet (left hand side) and Outlet (right hand side) for sinusoids modelled with lymphatic drainage. Models are with constant radius (cylinder) or with diverging radius (conical), and low (5%) porosity or high (20%) porosity.**

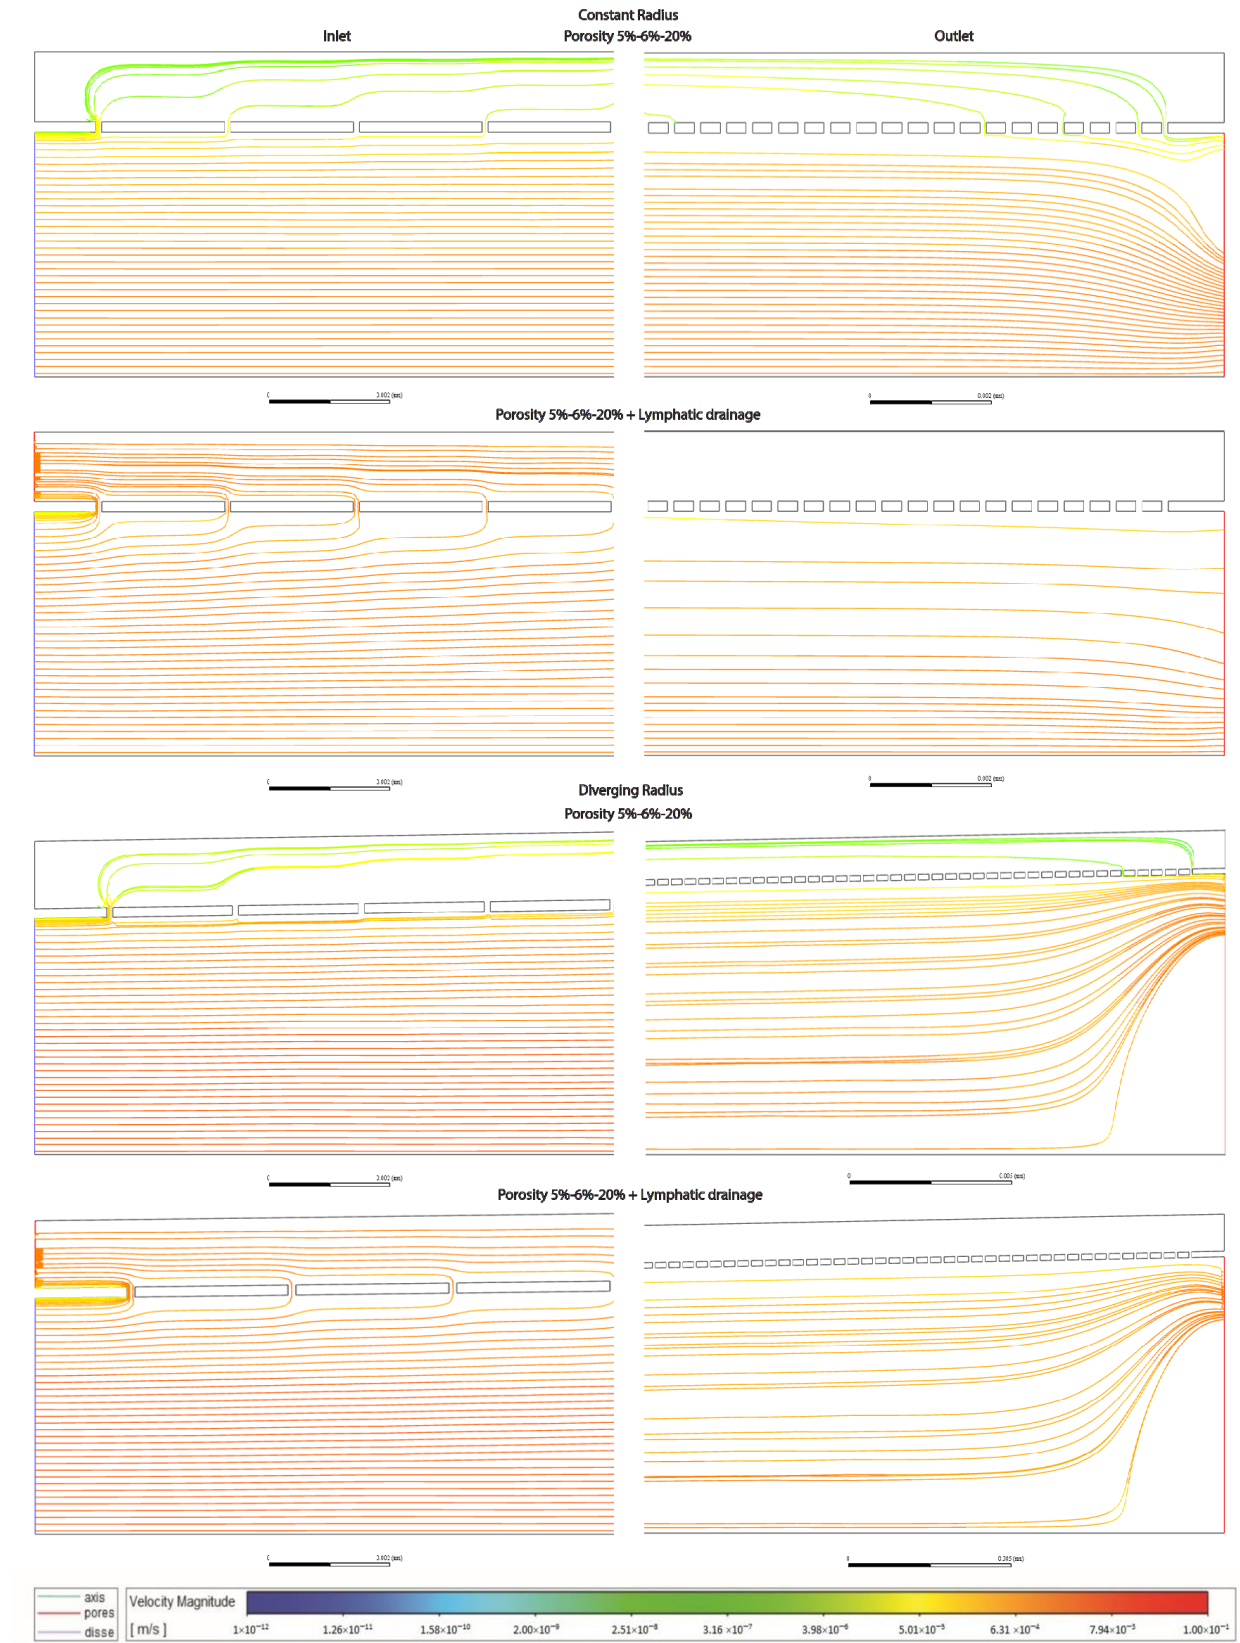

**Figure S3.** Streamlines at Inlet (left hand side) and Outlet (right hand side) for sinusoids modelled with variable porosity (5-6-20%), constant (cylinder) or diverging (conical) radius, and with or without lymphatic drainage.
